# Supplementary material for: Three-dimensional analysis of facial morphology in nine-year-old children with different unilateral orofacial clefts compared to normative data
Source: PeerJ. 2025 Jan 21;13:e18739. doi: 10.7717/peerj.18739 (PMC11758908; doi:10.7717/peerj.18739)
Supplement: Supplemental Information 1 — The differences in mm between the cleft children and the normal control model per region and subphenotype. [file peerj-13-18739-s001.xlsx]

## Sheet: Fusion-Differention
Group	Parameter	outcome	N	mean	stdev	min	max	lower	upper
Differentiatie	All	Abs.mean	52	2.72294	0.886598	1.48797	4.82034	2.47611	2.96977
Differentiatie	All	Abs.std	52	1.22303	0.407437	0.56452	2.4874	1.1096	1.33646
Differentiatie	All	Max	52	6.11118	2.28963	3.11934	14.0556	5.47375	6.74862
Differentiatie	All	Mean	52	-0.235485	1.89744	-4.25979	3.61035	-0.763735	0.292765
Differentiatie	All	Median	52	-0.486845	2.37341	-5.09992	4.63964	-1.14761	0.173918
Differentiatie	All	Min	52	-5.75071	1.47978	-8.93385	-2.8117	-6.16268	-5.33874
Differentiatie	All	RMS	52	2.99754	0.935724	1.59146	5.08743	2.73703	3.25805
Differentiatie	All	Standard.Dev	52	2.44786	0.520298	1.57882	3.81741	2.303	2.59271
Differentiatie	All	X10th.percentile	52	-3.21271	1.5467	-6.74145	1.24412	-3.64331	-2.78211
Differentiatie	All	X5th.percentile	52	-3.91609	1.36943	-7.21334	-1.54184	-4.29734	-3.53484
Differentiatie	All	X90th.percentile	52	2.94954	1.77156	-1.38145	6.72394	2.45633	3.44274
Differentiatie	All	X95th.percentile	52	4.03933	1.73093	1.59481	9.39411	3.55744	4.52122
Differentiatie	Cheeck	Abs.mean	52	2.59782	1.17272	0.916941	5.7578	2.27133	2.9243
Differentiatie	Cheeck	Abs.std	52	0.898743	0.312738	0.448431	1.59626	0.811676	0.98581
Differentiatie	Cheeck	Max	52	4.62326	2.78293	-0.719742	13.7334	3.84849	5.39803
Differentiatie	Cheeck	Mean	52	-0.656829	2.48627	-5.43595	5.40883	-1.34901	0.0353527
Differentiatie	Cheeck	Median	52	-0.754678	2.70873	-5.88267	6.06434	-1.50879	-0.000563389
Differentiatie	Cheeck	Min	52	-4.51926	1.59862	-8.07091	-2.02521	-4.96432	-4.0742
Differentiatie	Cheeck	RMS	52	2.75747	1.19368	1.02072	5.90363	2.42515	3.0898
Differentiatie	Cheeck	Standard.Dev	52	1.52008	0.447522	0.77385	2.83288	1.39549	1.64467
Differentiatie	Cheeck	X10th.percentile	52	-2.35951	2.43515	-6.90154	3.324	-3.03746	-1.68156
Differentiatie	Cheeck	X5th.percentile	52	-2.85297	2.20228	-7.22484	2.16917	-3.46608	-2.23985
Differentiatie	Cheeck	X90th.percentile	52	1.25475	2.54208	-3.35326	7.01652	0.547028	1.96247
Differentiatie	Cheeck	X95th.percentile	52	1.9677	2.3669	-2.54972	7.44071	1.30876	2.62665
Differentiatie	Chin	Abs.mean	52	3.38388	1.67386	1.23335	8.05809	2.91787	3.84988
Differentiatie	Chin	Abs.std	52	1.05508	0.582913	0.311493	3.12807	0.892798	1.21737
Differentiatie	Chin	Max	52	4.92576	3.21812	-3.42644	14.0556	4.02983	5.82169
Differentiatie	Chin	Mean	52	0.427465	3.04682	-5.45754	7.88748	-0.420776	1.27571
Differentiatie	Chin	Median	52	0.462454	3.44488	-5.33264	7.54464	-0.496607	1.42151
Differentiatie	Chin	Min	52	-3.89409	2.41323	-8.58814	2.76381	-4.56594	-3.22224
Differentiatie	Chin	RMS	52	3.56526	1.72957	1.32707	8.50124	3.08375	4.04678
Differentiatie	Chin	Standard.Dev	52	2.26644	1.11571	0.335198	5.52383	1.95583	2.57706
Differentiatie	Chin	X10th.percentile	52	-2.55317	2.59292	-7.23273	4.23798	-3.27504	-1.83129
Differentiatie	Chin	X5th.percentile	52	-3.0914	2.45	-7.80614	3.91995	-3.77348	-2.40931
Differentiatie	Chin	X90th.percentile	52	3.17259	3.83078	-4.60824	12.6365	2.10609	4.23908
Differentiatie	Chin	X95th.percentile	52	3.82098	3.7092	-4.47524	13.2897	2.78833	4.85363
Differentiatie	Eyes	Abs.mean	52	2.41056	1.06279	1.02329	5.3265	2.11468	2.70645
Differentiatie	Eyes	Abs.std	52	0.656003	0.275515	0.22983	1.45681	0.579299	0.732707
Differentiatie	Eyes	Max	52	3.46673	1.39766	1.59852	7.24032	3.07762	3.85584
Differentiatie	Eyes	Median	52	-0.00775106	2.27671	-3.65995	4.25131	-0.64159	0.626088
Differentiatie	Eyes	Min	52	-3.4819	1.70076	-8.03216	1.15492	-3.9554	-3.00841
Differentiatie	Eyes	RMS	52	2.5107	1.06854	1.08818	5.411	2.21321	2.80818
Differentiatie	Eyes	Standard.Dev	52	2.05018	1.20085	0.493274	5.40854	1.71586	2.3845
Differentiatie	Eyes	X10th.percentile	52	-2.6697	1.62936	-6.57941	1.84798	-3.12332	-2.21608
Differentiatie	Eyes	X5th.percentile	52	-2.96422	1.6167	-7.19978	1.62199	-3.41431	-2.51413
Differentiatie	Eyes	X90th.percentile	52	2.36585	1.83734	-1.83183	5.94545	1.85433	2.87737
Differentiatie	Eyes	X95th.percentile	52	2.75554	1.69132	-1.68885	6.31693	2.28467	3.2264
Differentiatie	Forehead	Abs.mean	52	2.89905	1.36028	1.16767	5.87777	2.52035	3.27775
Differentiatie	Forehead	Abs.std	52	0.813032	0.305258	0.296613	1.69304	0.728047	0.898016
Differentiatie	Forehead	Max	52	4.25059	1.7564	1.43851	7.69958	3.76161	4.73958
Differentiatie	Forehead	Mean	52	0.194825	2.34955	-4.80589	4.54784	-0.459295	0.848944
Differentiatie	Forehead	Median	52	0.0554412	3.02803	-5.80315	5.41332	-0.787567	0.898449
Differentiatie	Forehead	Min	52	-3.88433	2.15351	-8.93385	1.99797	-4.48387	-3.28479
Differentiatie	Forehead	RMS	52	3.02683	1.35846	1.20476	5.97602	2.64864	3.40503
Differentiatie	Forehead	Standard.Dev	52	2.12039	1.0215	0.70366	4.62547	1.83601	2.40478
Differentiatie	Forehead	X10th.percentile	52	-2.19031	2.7114	-7.50559	3.70208	-2.94516	-1.43545
Differentiatie	Forehead	X5th.percentile	52	-2.83311	2.49323	-7.83638	3.31578	-3.52723	-2.13899
Differentiatie	Forehead	X90th.percentile	52	3.15209	1.72488	-0.770794	6.81279	2.67189	3.6323
Differentiatie	Forehead	X95th.percentile	52	3.56575	1.71452	-0.68038	7.03748	3.08843	4.04308
Differentiatie	Lowerlip	Abs.mean	52	2.51249	0.869597	1.23269	4.83741	2.27039	2.75459
Differentiatie	Lowerlip	Abs.std	52	0.747541	0.24985	0.383972	1.35352	0.677982	0.8171
Differentiatie	Lowerlip	Max	52	3.62872	1.31475	-0.435594	7.40346	3.26269	3.99475
Differentiatie	Lowerlip	Mean	52	0.01627	1.70165	-3.22805	3.43635	-0.457472	0.490012
Differentiatie	Lowerlip	Median	52	-0.170436	2.38394	-4.24054	3.76776	-0.834129	0.493257
Differentiatie	Lowerlip	Min	52	-3.64947	1.58898	-7.27442	0.663513	-4.09184	-3.2071
Differentiatie	Lowerlip	RMS	52	2.63685	0.857593	1.34449	4.95128	2.3981	2.87561
Differentiatie	Lowerlip	Standard.Dev	52	1.99693	0.928979	0.874461	4.33079	1.7383	2.25556
Differentiatie	Lowerlip	X10th.percentile	52	-2.42919	1.95308	-5.85968	2.22535	-2.97293	-1.88545
Differentiatie	Lowerlip	X5th.percentile	52	-2.84301	1.80469	-6.21983	1.67831	-3.34544	-2.34058
Differentiatie	Lowerlip	X90th.percentile	52	2.65403	1.61723	-2.57148	5.26904	2.20379	3.10427
Differentiatie	Lowerlip	X95th.percentile	52	3.1001	1.44585	-1.15522	6.82576	2.69757	3.50262
Differentiatie	Nose	Abs.mean	52	2.4942	0.712787	1.21879	4.55154	2.29576	2.69265
Differentiatie	Nose	Abs.std	52	0.802808	0.298194	0.34067	1.65417	0.71979	0.885826
Differentiatie	Nose	Max	52	3.96925	0.96547	2.32974	6.45139	3.70046	4.23804
Differentiatie	Nose	Mean	52	-0.0582411	1.42811	-3.84113	2.85495	-0.45583	0.339348
Differentiatie	Nose	Median	52	0.137083	2.16714	-4.43084	3.39058	-0.466252	0.740417
Differentiatie	Nose	Min	52	-4.01939	1.10032	-7.12017	-2.25663	-4.32572	-3.71306
Differentiatie	Nose	RMS	52	2.63117	0.733719	1.33025	4.68374	2.4269	2.83544
Differentiatie	Nose	Standard.Dev	52	2.25265	0.61666	1.17747	3.81043	2.08097	2.42433
Differentiatie	Nose	X10th.percentile	52	-2.89849	1.39733	-6.09155	2.03569	-3.28751	-2.50947
Differentiatie	Nose	X5th.percentile	52	-3.31449	1.18075	-6.52622	-1.36289	-3.64321	-2.98577
Differentiatie	Nose	X90th.percentile	52	2.84848	1.20683	-1.46959	5.278	2.5125	3.18447
Differentiatie	Nose	X95th.percentile	52	3.33236	0.937861	1.41313	5.54906	3.07126	3.59347
Differentiatie	Upperlip	Abs.mean	52	2.40053	0.75845	1.08774	3.95856	2.18938	2.61168
Differentiatie	Upperlip	Abs.std	52	0.689095	0.20989	0.345532	1.26813	0.630662	0.747529
Differentiatie	Upperlip	Max	52	2.85192	1.86848	-2.54126	5.90859	2.33173	3.3721
Differentiatie	Upperlip	Mean	52	-0.399436	1.83663	-3.65978	3.48431	-0.910757	0.111885
Differentiatie	Upperlip	Median	52	-0.398408	2.26344	-3.67362	3.2131	-1.02855	0.231737
Differentiatie	Upperlip	Min	52	-3.62592	1.4965	-7.30437	1.4019	-4.04254	-3.20929
Differentiatie	Upperlip	RMS	52	2.50654	0.757023	1.26097	4.08087	2.29578	2.71729
Differentiatie	Upperlip	Standard.Dev	52	1.6327	0.851552	0.388314	3.46454	1.39562	1.86977
Differentiatie	Upperlip	X10th.percentile	52	-2.31247	1.85191	-5.34436	2.27049	-2.82805	-1.7969
Differentiatie	Upperlip	X5th.percentile	52	-2.70172	1.79734	-5.84711	1.98308	-3.2021	-2.20133
Differentiatie	Upperlip	X90th.percentile	52	1.68288	2.1969	-3.06787	5.14932	1.07126	2.2945
Differentiatie	Upperlip	X95th.percentile	52	2.18239	2.11085	-3.01323	5.4795	1.59472	2.77005
Fusie	All	Abs.mean	34	3.23111	1.25513	1.85675	7.85997	2.79317	3.66904
Fusie	All	Abs.std	34	1.32137	0.445153	0.677963	2.74506	1.16605	1.47669
Fusie	All	Max	34	6.79335	2.3449	3.66464	16.1051	5.97517	7.61152
Fusie	All	Mean	34	-0.404007	2.48682	-7.35778	5.27424	-1.2717	0.463684
Fusie	All	Median	34	-0.685612	2.98838	-7.9957	5.59	-1.72831	0.357083
Fusie	All	Min	34	-6.25231	1.85682	-12.9457	-3.51442	-6.90018	-5.60443
Fusie	All	RMS	34	3.50236	1.30023	2.07748	8.32554	3.04869	3.95603
Fusie	All	Standard.Dev	34	2.72196	0.585539	1.51362	3.89584	2.51765	2.92626
Fusie	All	X10th.percentile	34	-3.71629	2.27273	-11.4293	2.17367	-4.50929	-2.9233
Fusie	All	X5th.percentile	34	-4.4912	1.96085	-11.9841	-1.00981	-5.17537	-3.80703
Fusie	All	X90th.percentile	34	3.42861	2.01155	-3.39489	9.8088	2.72675	4.13047
Fusie	All	X95th.percentile	34	4.32158	2.10878	-2.05668	11.3342	3.5858	5.05737
Fusie	Cheeck	Abs.mean	34	3.15175	1.61875	1.18056	9.36462	2.58695	3.71656
Fusie	Cheeck	Abs.std	34	1.07014	0.439633	0.517833	2.51611	0.916743	1.22353
Fusie	Cheeck	Max	34	4.71597	3.0554	-1.94996	15.0194	3.64989	5.78205
Fusie	Cheeck	Mean	34	-1.0039	3.16067	-9.36462	6.44868	-2.10671	0.0989114
Fusie	Cheeck	Median	34	-0.946361	3.43225	-10.1064	6.72035	-2.14393	0.251209
Fusie	Cheeck	Min	34	-5.43913	2.04935	-12.9457	-2.53099	-6.15418	-4.72408
Fusie	Cheeck	RMS	34	3.33954	1.65457	1.28913	9.69676	2.76224	3.91685
Fusie	Cheeck	Standard.Dev	34	1.67529	0.555245	0.597825	2.91012	1.48155	1.86902
Fusie	Cheeck	X10th.percentile	34	-3.10018	2.96585	-12.0189	3.33902	-4.13501	-2.06535
Fusie	Cheeck	X5th.percentile	34	-3.47884	2.96573	-12.2794	3.01973	-4.51363	-2.44404
Fusie	Cheeck	X90th.percentile	34	1.07681	3.25907	-5.21918	9.81938	-0.0603352	2.21395
Fusie	Cheeck	X95th.percentile	34	1.63758	3.16788	-3.74554	10.662	0.532258	2.74291
Fusie	Chin	Abs.mean	34	3.98716	1.71345	1.93923	8.81742	3.3893	4.58501
Fusie	Chin	Abs.std	34	1.08203	0.577155	0.387303	3.22443	0.880653	1.28341
Fusie	Chin	Max	34	5.43017	3.38633	-5.09593	16.1051	4.24862	6.61171
Fusie	Chin	Mean	34	0.719808	3.69369	-8.25633	8.81742	-0.56898	2.0086
Fusie	Chin	Median	34	0.719903	4.06866	-8.12137	8.16248	-0.699719	2.13952
Fusie	Chin	Min	34	-3.3777	3.43794	-12.4391	3.64279	-4.57725	-2.17815
Fusie	Chin	RMS	34	4.15073	1.76177	2.02321	9.3885	3.53602	4.76544
Fusie	Chin	Standard.Dev	34	2.35921	0.970961	0.643319	4.41612	2.02043	2.698
Fusie	Chin	X10th.percentile	34	-1.96594	3.81269	-10.6525	5.23001	-3.29625	-0.63563
Fusie	Chin	X5th.percentile	34	-2.46828	3.67748	-11.1599	4.55265	-3.75141	-1.18514
Fusie	Chin	X90th.percentile	34	3.6349	4.00097	-6.01687	13.3389	2.2389	5.03091
Fusie	Chin	X95th.percentile	34	4.82833	3.26073	-5.62685	14.5346	3.6906	5.96605
Fusie	Eyes	Abs.mean	34	2.68595	0.994764	1.22509	4.9387	2.33886	3.03304
Fusie	Eyes	Abs.std	34	0.634736	0.157217	0.391957	1.08349	0.579881	0.689592
Fusie	Eyes	Max	34	3.92806	1.24108	2.02094	6.63898	3.49503	4.3611
Fusie	Eyes	Median	34	0.452621	2.46426	-4.19073	3.68909	-0.407199	1.31244
Fusie	Eyes	Min	34	-3.9079	1.37348	-7.69255	-1.51328	-4.38713	-3.42867
Fusie	Eyes	RMS	34	2.76615	0.989375	1.3292	5.05616	2.42094	3.11136
Fusie	Eyes	Standard.Dev	34	2.44841	0.985358	1.09357	4.70448	2.1046	2.79222
Fusie	Eyes	X10th.percentile	34	-2.84968	1.71302	-6.45065	2.15767	-3.44738	-2.25198
Fusie	Eyes	X5th.percentile	34	-3.24484	1.59504	-6.9194	1.87053	-3.80138	-2.68831
Fusie	Eyes	X90th.percentile	34	3.164	1.06546	1.38985	5.22799	2.79224	3.53575
Fusie	Eyes	X95th.percentile	34	3.41404	1.11529	1.57644	5.38276	3.0249	3.80318
Fusie	Forehead	Abs.mean	34	3.36364	1.56291	1.18275	8.21338	2.81832	3.90897
Fusie	Forehead	Abs.std	34	0.877743	0.291908	0.470265	1.49682	0.775891	0.979595
Fusie	Forehead	Max	34	4.70762	2.08158	1.46439	9.9144	3.98132	5.43392
Fusie	Forehead	Mean	34	0.0262504	2.61716	-6.80824	5.38144	-0.886921	0.939422
Fusie	Forehead	Median	34	-0.211915	3.49059	-8.16374	5.5054	-1.42984	1.00601
Fusie	Forehead	Min	34	-4.78138	2.039	-11.7217	-1.69536	-5.49282	-4.06994
Fusie	Forehead	RMS	34	3.49356	1.55042	1.27565	8.34029	2.95259	4.03453
Fusie	Forehead	Standard.Dev	34	2.5457	1.20474	0.777351	5.53739	2.12535	2.96605
Fusie	Forehead	X10th.percentile	34	-2.73655	3.20017	-10.0418	3.99938	-3.85314	-1.61995
Fusie	Forehead	X5th.percentile	34	-3.4873	2.78862	-10.4384	3.74031	-4.46029	-2.5143
Fusie	Forehead	X90th.percentile	34	3.41689	1.9659	-0.923417	7.36443	2.73095	4.10282
Fusie	Forehead	X95th.percentile	34	3.84482	1.89419	-0.566771	7.8076	3.18391	4.50574
Fusie	Lowerlip	Abs.mean	34	2.91289	1.11688	1.32517	6.10641	2.52319	3.30259
Fusie	Lowerlip	Abs.std	34	0.868304	0.273414	0.368833	1.55235	0.772905	0.963703
Fusie	Lowerlip	Max	34	4.1666	1.45121	1.26091	7.36805	3.66025	4.67295
Fusie	Lowerlip	Mean	34	0.0835775	2.05507	-4.83138	3.62038	-0.633471	0.800626
Fusie	Lowerlip	Median	34	-0.140905	2.81412	-5.48652	3.61445	-1.1228	0.840989
Fusie	Lowerlip	Min	34	-4.04048	2.16372	-8.16762	1.35129	-4.79544	-3.28552
Fusie	Lowerlip	RMS	34	3.05749	1.0998	1.44295	6.14088	2.67375	3.44122
Fusie	Lowerlip	Standard.Dev	34	2.27474	1.13107	0.762587	5.78132	1.88009	2.66938
Fusie	Lowerlip	X10th.percentile	34	-2.65909	2.42745	-7.09246	2.08914	-3.50606	-1.81211
Fusie	Lowerlip	X5th.percentile	34	-3.02203	2.40948	-7.31648	1.74313	-3.86274	-2.18133
Fusie	Lowerlip	X90th.percentile	34	2.95763	2.17851	-3.61894	6.81874	2.19752	3.71775
Fusie	Lowerlip	X95th.percentile	34	3.38939	2.00175	-2.79789	7.04106	2.69094	4.08783
Fusie	Nose	Abs.mean	34	2.95027	1.05053	1.53731	7.07194	2.58372	3.31682
Fusie	Nose	Abs.std	34	0.947186	0.348578	0.461103	1.95317	0.825562	1.06881
Fusie	Nose	Max	34	4.72541	1.28356	2.57822	8.99205	4.27756	5.17327
Fusie	Nose	Mean	34	-0.167307	1.94387	-6.22303	2.45522	-0.845553	0.51094
Fusie	Nose	Median	34	-0.0958517	2.67827	-6.84741	3.28225	-1.03035	0.838642
Fusie	Nose	Min	34	-4.78879	1.68877	-10.4471	-1.85532	-5.37803	-4.19956
Fusie	Nose	RMS	34	3.11058	1.07164	1.65825	7.3367	2.73667	3.4845
Fusie	Nose	Standard.Dev	34	2.57866	0.677403	1.2652	3.886	2.34231	2.81502
Fusie	Nose	X10th.percentile	34	-3.38747	2.10012	-9.83095	1.85339	-4.12023	-2.6547
Fusie	Nose	X5th.percentile	34	-3.9755	1.78266	-10.1366	-1.27595	-4.5975	-3.3535
Fusie	Nose	X90th.percentile	34	3.0232	1.74386	-3.63121	5.17853	2.41474	3.63167
Fusie	Nose	X95th.percentile	34	3.84381	0.898598	2.33956	5.9261	3.53028	4.15735
Fusie	Upperlip	Abs.mean	34	2.82922	1.23248	1.14773	5.90226	2.39919	3.25925
Fusie	Upperlip	Abs.std	34	0.729094	0.19661	0.361322	1.28885	0.660494	0.797695
Fusie	Upperlip	Max	34	1.79125	2.85996	-4.37546	5.55256	0.793363	2.78914
Fusie	Upperlip	Mean	34	-1.34416	2.41779	-5.90226	2.73137	-2.18777	-0.500559
Fusie	Upperlip	Median	34	-1.48827	2.61015	-5.93527	2.80333	-2.39899	-0.577546
Fusie	Upperlip	Min	34	-4.1894	2.07807	-7.77165	1.24493	-4.91447	-3.46433
Fusie	Upperlip	RMS	34	2.93574	1.21353	1.26096	5.97135	2.51232	3.35916
Fusie	Upperlip	Standard.Dev	34	1.40799	0.776318	0.361322	3.04949	1.13712	1.67886
Fusie	Upperlip	X10th.percentile	34	-2.83424	2.42236	-7.18312	2.04712	-3.67944	-1.98904
Fusie	Upperlip	X5th.percentile	34	-3.16191	2.43209	-7.37728	1.8068	-4.0105	-2.31331
Fusie	Upperlip	X90th.percentile	34	0.844993	2.76026	-4.74484	4.09641	-0.118107	1.80809
Fusie	Upperlip	X95th.percentile	34	1.19989	2.76797	-4.63082	4.54709	0.2341	2.16568
	Fusion (N=34)				Differentiation (N=52)
Region	mean2	SD3	P5 – P95%	max2	mean	SD	min	max
All	-0.404007	2.48682	-1.2717	0.463684	-0.235485	1.89744	-0.763735	0.292765
Cheek	-1.0039	3.16067	-2.10671	0.0989114	-0.656829	2.48627	-1.34901	0.0353527
Chin	0.719808	3.69369	-0.56898	2.0086	0.427465	3.04682	-0.420776	1.27571
Forehead	0.0262504	2.61716	-0.886921	0.939422	0.194825	2.34955	-0.459295	0.848944
Lowerlip	0.0835775	2.05507	-0.633471	0.800626	0.01627	1.70165	-0.457472	0.490012
Nose	-0.167307	1.94387	-0.845553	0.51094	-0.0582411	1.42811	-0.45583	0.339348
Upperlip	-1.34416	2.41779	-2.18777	-0.500559	-0.399436	1.83663	-0.910757	0.111885

## Sheet: UCL-UCLA-UCLP
Group	Parameter	outcome	N	mean	stdev	min	max	lower	upper
UCL	All	Abs.mean	25	2.80637	0.895323	1.61888	4.66474	2.4368	3.17594
UCL	All	Abs.std	25	1.23137	0.375717	0.802469	2.4874	1.07628	1.38646
UCL	All	Max	25	6.32988	2.25106	3.28983	14.0556	5.40069	7.25907
UCL	All	Mean	25	-0.0642409	2.00839	-3.84583	3.61035	-0.893263	0.764781
UCL	All	Median	25	-0.392754	2.56569	-4.64456	4.63964	-1.45182	0.666312
UCL	All	Min	25	-5.66005	1.36811	-8.43262	-2.8117	-6.22477	-5.09532
UCL	All	RMS	25	3.07859	0.92384	1.898	4.91335	2.69724	3.45993
UCL	All	Standard.Dev	25	2.48936	0.482729	1.87852	3.38857	2.2901	2.68862
UCL	All	X10th.percentile	25	-3.08534	1.57002	-6.73935	1.24412	-3.73341	-2.43727
UCL	All	X5th.percentile	25	-3.82732	1.3649	-7.21334	-1.54184	-4.39072	-3.26392
UCL	All	X90th.percentile	25	3.27728	1.6847	-1.06491	6.67086	2.58187	3.97269
UCL	All	X95th.percentile	25	4.32096	1.62303	2.23805	8.79301	3.651	4.99091
UCL	Cheeck	Abs.mean	25	2.68185	1.22211	0.916941	5.7578	2.17739	3.18632
UCL	Cheeck	Abs.std	25	0.896584	0.278053	0.448431	1.49329	0.781809	1.01136
UCL	Cheeck	Max	25	4.73503	2.94699	-0.719742	13.7334	3.51857	5.95149
UCL	Cheeck	Mean	25	-0.426627	2.66623	-4.91375	5.40883	-1.52719	0.673937
UCL	Cheeck	Median	25	-0.525231	2.88579	-4.81965	6.06434	-1.71643	0.665964
UCL	Cheeck	Min	25	-4.40944	1.46588	-7.75257	-2.02521	-5.01453	-3.80436
UCL	Cheeck	RMS	25	2.83913	1.22627	1.02072	5.90363	2.33295	3.34531
UCL	Cheeck	Standard.Dev	25	1.52726	0.414958	0.847566	2.36588	1.35597	1.69855
UCL	Cheeck	X10th.percentile	25	-2.05976	2.58457	-6.72697	3.324	-3.12662	-0.992907
UCL	Cheeck	X5th.percentile	25	-2.59406	2.25896	-7.11063	2.16917	-3.52651	-1.66161
UCL	Cheeck	X90th.percentile	25	1.38962	2.7792	-3.35326	7.01652	0.242426	2.53682
UCL	Cheeck	X95th.percentile	25	2.23002	2.53207	-2.54972	7.44071	1.18484	3.27521
UCL	Chin	Abs.mean	25	3.46689	1.61687	1.23335	8.05809	2.79948	4.1343
UCL	Chin	Abs.std	25	1.03617	0.551333	0.335198	2.7089	0.808588	1.26375
UCL	Chin	Max	25	4.99864	3.44881	-3.42644	14.0556	3.57505	6.42224
UCL	Chin	Mean	25	0.479641	3.09485	-5.25576	6.46207	-0.797849	1.75713
UCL	Chin	Median	25	0.51522	3.52838	-5.00846	7.54464	-0.941224	1.97166
UCL	Chin	Min	25	-3.63551	2.60139	-7.73895	2.76381	-4.70931	-2.56171
UCL	Chin	RMS	25	3.63801	1.66439	1.32707	8.50124	2.95098	4.32503
UCL	Chin	Standard.Dev	25	2.27867	1.15341	0.335198	5.52383	1.80257	2.75478
UCL	Chin	X10th.percentile	25	-2.34235	2.76617	-6.9525	3.60417	-3.48417	-1.20053
UCL	Chin	X5th.percentile	25	-2.93685	2.52916	-7.34537	3.11518	-3.98083	-1.89286
UCL	Chin	X90th.percentile	25	3.11505	3.94584	-4.11736	12.3187	1.48628	4.74381
UCL	Chin	X95th.percentile	25	4.10859	3.57273	-3.90652	13.2897	2.63385	5.58334
UCL	Eyes	Abs.mean	25	2.51464	1.00393	1.14752	4.87262	2.10024	2.92905
UCL	Eyes	Abs.std	25	0.702824	0.295791	0.22983	1.45681	0.580727	0.82492
UCL	Eyes	Max	25	3.53687	1.44588	1.59852	6.75353	2.94004	4.1337
UCL	Eyes	Median	25	-0.0627409	2.36467	-3.43504	4.25131	-1.03883	0.913349
UCL	Eyes	Min	25	-3.77011	1.5266	-6.82361	-1.26222	-4.40026	-3.13996
UCL	Eyes	RMS	25	2.62532	1.00864	1.17031	4.93508	2.20897	3.04166
UCL	Eyes	Standard.Dev	25	2.12347	1.1883	0.493274	4.82272	1.63297	2.61398
UCL	Eyes	X10th.percentile	25	-2.89681	1.46564	-5.71591	0.65496	-3.5018	-2.29183
UCL	Eyes	X5th.percentile	25	-3.25307	1.38288	-6.11276	-0.974328	-3.8239	-2.68225
UCL	Eyes	X90th.percentile	25	2.42428	1.99731	-1.83183	5.93243	1.59983	3.24873
UCL	Eyes	X95th.percentile	25	2.69288	2.02639	-1.68885	6.31693	1.85643	3.52933
UCL	Forehead	Abs.mean	25	3.07452	1.35579	1.16767	5.87777	2.51488	3.63416
UCL	Forehead	Abs.std	25	0.899296	0.327102	0.296613	1.69304	0.764275	1.03432
UCL	Forehead	Max	25	4.53583	1.76988	1.54073	7.432	3.80526	5.2664
UCL	Forehead	Mean	25	0.451526	2.48983	-4.80589	4.54784	-0.576225	1.47928
UCL	Forehead	Median	25	0.333048	3.16967	-5.80315	5.41332	-0.975328	1.64142
UCL	Forehead	Min	25	-3.59793	2.477	-8.43262	1.99797	-4.62038	-2.57547
UCL	Forehead	RMS	25	3.22277	1.34727	1.20476	5.97602	2.66665	3.77889
UCL	Forehead	Standard.Dev	25	2.20556	1.07486	0.905473	4.62547	1.76188	2.64924
UCL	Forehead	X10th.percentile	25	-1.97027	2.92448	-7.50559	2.80883	-3.17744	-0.763104
UCL	Forehead	X5th.percentile	25	-2.65625	2.70974	-7.83638	2.3781	-3.77478	-1.53773
UCL	Forehead	X90th.percentile	25	3.56928	1.63263	0.584497	6.81279	2.89536	4.24319
UCL	Forehead	X95th.percentile	25	3.9633	1.67261	0.885753	7.03748	3.27288	4.65372
UCL	Lowerlip	Abs.mean	25	2.54824	0.954451	1.23269	4.32778	2.15426	2.94222
UCL	Lowerlip	Abs.std	25	0.686528	0.241685	0.383972	1.30838	0.586765	0.78629
UCL	Lowerlip	Max	25	3.71363	1.18337	1.4031	6.06653	3.22516	4.2021
UCL	Lowerlip	Mean	25	-0.0177103	1.79837	-3.22805	3.43635	-0.760042	0.724622
UCL	Lowerlip	Median	25	-0.282292	2.53601	-3.87743	3.76776	-1.32911	0.764523
UCL	Lowerlip	Min	25	-3.6079	1.45677	-7.22666	-1.22536	-4.20922	-3.00658
UCL	Lowerlip	RMS	25	2.65977	0.92481	1.34449	4.45767	2.27803	3.04152
UCL	Lowerlip	Standard.Dev	25	2.01135	0.880842	0.874461	4.11478	1.64775	2.37494
UCL	Lowerlip	X10th.percentile	25	-2.52106	1.81005	-5.61515	2.22535	-3.26822	-1.77391
UCL	Lowerlip	X5th.percentile	25	-2.80495	1.78998	-5.86829	1.67831	-3.54381	-2.06608
UCL	Lowerlip	X90th.percentile	25	2.6286	1.6981	-2.57148	4.87476	1.92766	3.32954
UCL	Lowerlip	X95th.percentile	25	3.20116	1.27819	0.603693	5.74963	2.67355	3.72877
UCL	Nose	Abs.mean	25	2.46767	0.71225	1.326	4.55154	2.17367	2.76167
UCL	Nose	Abs.std	25	0.702756	0.242062	0.34067	1.28256	0.602838	0.802675
UCL	Nose	Max	25	3.73892	0.742002	2.32974	5.00329	3.43263	4.0452
UCL	Nose	Mean	25	-0.09901	1.67293	-3.84113	2.85495	-0.789562	0.591542
UCL	Nose	Median	25	0.205774	2.36242	-4.43084	3.39058	-0.769385	1.18093
UCL	Nose	Min	25	-3.78878	1.04224	-7.12017	-2.25663	-4.219	-3.35857
UCL	Nose	RMS	25	2.57206	0.729611	1.39152	4.68374	2.27089	2.87323
UCL	Nose	Standard.Dev	25	2.0615	0.433244	1.28659	3.2058	1.88266	2.24033
UCL	Nose	X10th.percentile	25	-2.71932	1.45649	-6.09155	2.03569	-3.32052	-2.11811
UCL	Nose	X5th.percentile	25	-3.2081	1.03564	-6.52622	-1.99427	-3.63559	-2.78061
UCL	Nose	X90th.percentile	25	2.46432	1.36652	-1.46959	4.22263	1.90025	3.02839
UCL	Nose	X95th.percentile	25	3.05565	0.807963	1.41313	4.47354	2.72214	3.38916
UCL	Upperlip	Abs.mean	25	2.42353	0.726526	1.45943	3.95856	2.12363	2.72342
UCL	Upperlip	Abs.std	25	0.695386	0.218252	0.345532	1.0888	0.605296	0.785476
UCL	Upperlip	Max	25	3.39038	1.49156	-1.20369	5.90859	2.77469	4.00606
UCL	Upperlip	Mean	25	0.202721	1.91022	-2.83962	3.48431	-0.585777	0.991219
UCL	Upperlip	Median	25	0.0919212	2.33558	-3.67362	3.2131	-0.872158	1.056
UCL	Upperlip	Min	25	-3.2779	1.6757	-7.30437	1.4019	-3.9696	-2.58621
UCL	Upperlip	RMS	25	2.52708	0.738371	1.50934	4.08087	2.22229	2.83186
UCL	Upperlip	Standard.Dev	25	1.64673	0.825202	0.605327	3.27504	1.3061	1.98736
UCL	Upperlip	X10th.percentile	25	-1.75895	2.19692	-5.34436	2.27049	-2.6658	-0.852108
UCL	Upperlip	X5th.percentile	25	-2.11287	2.19006	-5.84711	1.98308	-3.01688	-1.20886
UCL	Upperlip	X90th.percentile	25	2.3947	1.82351	-1.7696	5.14561	1.64199	3.14741
UCL	Upperlip	X95th.percentile	25	2.73395	1.90264	-1.56282	5.4795	1.94857	3.51932
UCLA	All	Abs.mean	21	2.77419	0.782531	1.65999	3.98837	2.41799	3.13039
UCLA	All	Abs.std	21	1.24762	0.333427	0.677963	1.90534	1.09584	1.39939
UCLA	All	Max	21	6.06803	1.80854	3.72741	10.6438	5.2448	6.89127
UCLA	All	Mean	21	-0.506105	1.80639	-3.4316	3.22135	-1.32836	0.316153
UCLA	All	Median	21	-0.772942	2.24051	-3.79417	3.81808	-1.79281	0.246924
UCLA	All	Min	21	-6.16671	1.45355	-8.93385	-3.51442	-6.82836	-5.50506
UCLA	All	RMS	21	3.05525	0.798477	1.91578	4.18078	2.69179	3.41871
UCLA	All	Standard.Dev	21	2.51477	0.51633	1.83581	3.81741	2.27974	2.7498
UCLA	All	X10th.percentile	21	-3.65355	1.37593	-6.15646	-1.30447	-4.27987	-3.02723
UCLA	All	X5th.percentile	21	-4.30827	1.27057	-6.72844	-2.42713	-4.88663	-3.72992
UCLA	All	X90th.percentile	21	2.8107	1.68831	-1.38145	5.88343	2.04219	3.57921
UCLA	All	X95th.percentile	21	3.86995	1.53669	1.59481	7.6811	3.17046	4.56945
UCLA	Cheeck	Abs.mean	21	2.66275	1.13152	1.02861	4.88945	2.14769	3.17781
UCLA	Cheeck	Abs.std	21	0.936824	0.332506	0.525078	1.59626	0.785469	1.08818
UCLA	Cheeck	Max	21	4.38199	2.62238	-1.29153	10.1423	3.1883	5.57568
UCLA	Cheeck	Mean	21	-1.1736	2.46858	-4.88088	3.45684	-2.29728	-0.049911
UCLA	Cheeck	Median	21	-1.28394	2.58718	-5.15978	3.47944	-2.46161	-0.106271
UCLA	Cheeck	Min	21	-4.96857	1.69088	-8.07091	-2.53099	-5.73825	-4.19889
UCLA	Cheeck	RMS	21	2.83235	1.15493	1.15488	5.12571	2.30663	3.35807
UCLA	Cheeck	Standard.Dev	21	1.39853	0.404201	0.597825	2.23019	1.21454	1.58252
UCLA	Cheeck	X10th.percentile	21	-2.71466	2.6598	-6.73462	2.60721	-3.92539	-1.50393
UCLA	Cheeck	X5th.percentile	21	-3.10304	2.66174	-7.22484	2.42658	-4.31465	-1.89143
UCLA	Cheeck	X90th.percentile	21	0.605036	2.47183	-2.6284	5.02772	-0.520126	1.7302
UCLA	Cheeck	X95th.percentile	21	1.26465	2.36247	-2.11363	5.74013	0.189265	2.34003
UCLA	Chin	Abs.mean	21	3.50927	1.47163	1.54415	6.66911	2.83939	4.17915
UCLA	Chin	Abs.std	21	1.076	0.445849	0.429281	2.10803	0.873051	1.27895
UCLA	Chin	Max	21	4.97658	2.72543	-1.69432	10.6438	3.73598	6.21718
UCLA	Chin	Mean	21	0.374871	2.90105	-5.29519	5.79498	-0.945672	1.69541
UCLA	Chin	Median	21	0.698944	3.45685	-5.24758	6.24107	-0.874595	2.27248
UCLA	Chin	Min	21	-4.51129	2.42693	-8.58814	2.91647	-5.61601	-3.40656
UCLA	Chin	RMS	21	3.69594	1.47239	1.83205	6.98555	3.02571	4.36616
UCLA	Chin	Standard.Dev	21	2.51602	1.14031	0.429281	5.15189	1.99696	3.03509
UCLA	Chin	X10th.percentile	21	-3.24422	2.40726	-7.23273	4.27064	-4.33999	-2.14845
UCLA	Chin	X5th.percentile	21	-3.64199	2.47982	-7.80614	4.05145	-4.77079	-2.51319
UCLA	Chin	X90th.percentile	21	3.49446	3.35384	-3.84887	9.81009	1.96781	5.02111
UCLA	Chin	X95th.percentile	21	3.88436	3.40793	-3.45811	10.0837	2.33309	5.43563
UCLA	Eyes	Abs.mean	21	2.41407	1.05702	1.03452	5.3118	1.93292	2.89522
UCLA	Eyes	Abs.std	21	0.627399	0.251061	0.254011	1.37716	0.513118	0.741681
UCLA	Eyes	Max	21	3.42003	1.43434	1.63256	7.24032	2.76713	4.07293
UCLA	Eyes	Median	21	-0.530961	2.27859	-3.65995	3.89867	-1.56816	0.506241
UCLA	Eyes	Min	21	-3.67311	1.56852	-8.03216	-1.73989	-4.38709	-2.95912
UCLA	Eyes	RMS	21	2.50191	1.06782	1.10468	5.411	2.01584	2.98797
UCLA	Eyes	Standard.Dev	21	2.09694	1.15621	0.963076	5.40854	1.57064	2.62324
UCLA	Eyes	X10th.percentile	21	-2.82616	1.69346	-6.57941	1.17714	-3.59702	-2.05531
UCLA	Eyes	X5th.percentile	21	-3.21563	1.51274	-7.19978	-1.54434	-3.90422	-2.52704
UCLA	Eyes	X90th.percentile	21	2.35234	1.56048	-1.37266	5.91136	1.64202	3.06267
UCLA	Eyes	X95th.percentile	21	2.77432	1.29643	0.707225	6.16952	2.1842	3.36445
UCLA	Forehead	Abs.mean	21	2.88669	1.27654	1.21384	4.93367	2.30562	3.46777
UCLA	Forehead	Abs.std	21	0.720737	0.279617	0.429738	1.25423	0.593457	0.848017
UCLA	Forehead	Max	21	4.05191	1.5409	1.43851	6.2802	3.3505	4.75332
UCLA	Forehead	Mean	21	0.229402	2.23676	-2.81069	4.39182	-0.788757	1.24756
UCLA	Forehead	Median	21	-0.101537	2.99827	-4.38045	4.88477	-1.46633	1.26326
UCLA	Forehead	Min	21	-4.13602	1.84285	-8.93385	-1.35483	-4.97488	-3.29717
UCLA	Forehead	RMS	21	2.99185	1.26653	1.29391	5.00782	2.41533	3.56837
UCLA	Forehead	Standard.Dev	21	2.15168	1.04081	0.70366	4.14467	1.6779	2.62545
UCLA	Forehead	X10th.percentile	21	-2.2086	2.65507	-6.44364	3.98749	-3.41718	-1.00003
UCLA	Forehead	X5th.percentile	21	-2.93856	2.3715	-7.48434	3.31578	-4.01806	-1.85907
UCLA	Forehead	X90th.percentile	21	3.06169	1.83455	-0.770794	5.56106	2.22661	3.89676
UCLA	Forehead	X95th.percentile	21	3.40615	1.73802	-0.68038	5.89176	2.61502	4.19729
UCLA	Lowerlip	Abs.mean	21	2.49301	0.772836	1.24225	4.83741	2.14122	2.8448
UCLA	Lowerlip	Abs.std	21	0.821311	0.256734	0.368833	1.39598	0.704447	0.938175
UCLA	Lowerlip	Max	21	3.33741	1.53395	-0.435594	7.40346	2.63916	4.03565
UCLA	Lowerlip	Mean	21	-0.396309	1.60914	-2.85834	2.29518	-1.12878	0.336162
UCLA	Lowerlip	Median	21	-0.574262	2.21936	-4.24054	2.63147	-1.5845	0.435978
UCLA	Lowerlip	Min	21	-3.98571	1.38076	-7.09823	-1.8615	-4.61422	-3.35719
UCLA	Lowerlip	RMS	21	2.63526	0.778131	1.39826	4.95128	2.28106	2.98946
UCLA	Lowerlip	Standard.Dev	21	2.02899	0.905775	1.03568	4.33079	1.61669	2.44129
UCLA	Lowerlip	X10th.percentile	21	-2.90344	1.70075	-5.85968	0.975575	-3.67761	-2.12926
UCLA	Lowerlip	X5th.percentile	21	-3.41358	1.35458	-6.21983	-0.799766	-4.03018	-2.79699
UCLA	Lowerlip	X90th.percentile	21	2.28448	1.87073	-1.40355	5.26904	1.43293	3.13603
UCLA	Lowerlip	X95th.percentile	21	2.77399	1.85934	-1.15522	6.82576	1.92763	3.62035
UCLA	Nose	Abs.mean	21	2.59186	0.733384	1.21879	4.02655	2.25802	2.92569
UCLA	Nose	Abs.std	21	0.818816	0.301373	0.461103	1.41071	0.681633	0.956
UCLA	Nose	Max	21	4.22198	1.11163	2.75085	6.41532	3.71597	4.72799
UCLA	Nose	Mean	21	-0.0810588	1.2788	-3.21874	2.37486	-0.66316	0.501042
UCLA	Nose	Median	21	-0.257672	2.18637	-4.18415	2.81164	-1.2529	0.737552
UCLA	Nose	Min	21	-4.20627	1.06866	-6.36195	-2.48887	-4.69272	-3.71982
UCLA	Nose	RMS	21	2.72559	0.765488	1.33025	4.25021	2.37715	3.07404
UCLA	Nose	Standard.Dev	21	2.43831	0.708114	1.17747	3.81043	2.11598	2.76064
UCLA	Nose	X10th.percentile	21	-3.11717	1.26744	-5.67337	-1.12569	-3.6941	-2.54024
UCLA	Nose	X5th.percentile	21	-3.47692	1.27914	-5.92393	-1.36289	-4.05918	-2.89466
UCLA	Nose	X90th.percentile	21	3.14066	0.894744	1.80281	4.66457	2.73338	3.54795
UCLA	Nose	X95th.percentile	21	3.59277	0.958383	1.95135	5.45542	3.15652	4.02902
UCLA	Upperlip	Abs.mean	21	2.35641	0.859167	1.08774	3.67586	1.96532	2.7475
UCLA	Upperlip	Abs.std	21	0.673614	0.209577	0.388314	1.26813	0.578216	0.769012
UCLA	Upperlip	Max	21	2.42731	2.16846	-2.54126	5.67482	1.44023	3.41438
UCLA	Upperlip	Mean	21	-0.545289	1.88819	-3.67586	2.47249	-1.40478	0.314203
UCLA	Upperlip	Median	21	-0.380341	2.31344	-3.77741	3.20945	-1.43341	0.672726
UCLA	Upperlip	Min	21	-3.7612	1.13036	-6.02291	-2.00929	-4.27574	-3.24667
UCLA	Upperlip	RMS	21	2.46721	0.835074	1.26097	3.84625	2.08709	2.84733
UCLA	Upperlip	Standard.Dev	21	1.49659	0.927154	0.388314	3.46454	1.07455	1.91862
UCLA	Upperlip	X10th.percentile	21	-2.24821	1.79818	-4.29585	1.8949	-3.06673	-1.42969
UCLA	Upperlip	X5th.percentile	21	-2.71896	1.6839	-4.76601	1.76984	-3.48546	-1.95246
UCLA	Upperlip	X90th.percentile	21	1.29947	2.45105	-3.06787	5.14932	0.183762	2.41517
UCLA	Upperlip	X95th.percentile	21	1.7905	2.38334	-3.01323	5.37626	0.705619	2.87538
UCLP	All	Abs.mean	40	3.07584	1.28261	1.48797	7.85997	2.66564	3.48604
UCLP	All	Abs.std	40	1.2885	0.49451	0.56452	2.74506	1.13035	1.44665
UCLP	All	Max	40	6.57699	2.61991	3.11934	16.1051	5.7391	7.41488
UCLP	All	Mean	40	-0.343681	2.39579	-7.35778	5.27424	-1.10989	0.42253
UCLP	All	Median	40	-0.564403	2.87683	-7.9957	5.59	-1.48446	0.355652
UCLP	All	Min	40	-6.01533	1.89595	-12.9457	-3.15696	-6.62169	-5.40898
UCLP	All	RMS	40	3.34569	1.34729	1.59146	8.32554	2.9148	3.77657
UCLP	All	Standard.Dev	40	2.61977	0.629022	1.51362	3.89584	2.4186	2.82094
UCLP	All	X10th.percentile	40	-3.48892	2.24477	-11.4293	2.17367	-4.20683	-2.77101
UCLP	All	X5th.percentile	40	-4.25452	1.95307	-11.9841	-1.00981	-4.87914	-3.6299
UCLP	All	X90th.percentile	40	3.2248	2.08871	-3.39489	9.8088	2.5568	3.8928
UCLP	All	X95th.percentile	40	4.19215	2.19726	-2.05668	11.3342	3.48944	4.89487
UCLP	Cheeck	Abs.mean	40	2.98205	1.59664	1.18056	9.36462	2.47142	3.49268
UCLP	Cheeck	Abs.std	40	1.02579	0.442085	0.517833	2.51611	0.8844	1.16717
UCLP	Cheeck	Max	40	4.75887	3.01748	-1.94996	15.0194	3.79384	5.72391
UCLP	Cheeck	Mean	40	-0.824411	2.98918	-9.36462	6.44868	-1.7804	0.131577
UCLP	Cheeck	Median	40	-0.78315	3.29425	-10.1064	6.72035	-1.8367	0.270402
UCLP	Cheeck	Min	40	-5.13389	2.08347	-12.9457	-2.39433	-5.80022	-4.46757
UCLP	Cheeck	RMS	40	3.16189	1.64032	1.28913	9.69676	2.63729	3.68649
UCLP	Cheeck	Standard.Dev	40	1.71133	0.555445	0.921988	2.91012	1.53369	1.88897
UCLP	Cheeck	X10th.percentile	40	-2.98997	2.72101	-12.0189	3.33902	-3.86019	-2.11975
UCLP	Cheeck	X5th.percentile	40	-3.41548	2.63658	-12.2794	3.01973	-4.2587	-2.57226
UCLP	Cheeck	X90th.percentile	40	1.3603	3.0543	-5.21918	9.81938	0.383491	2.33711
UCLP	Cheeck	X95th.percentile	40	1.89226	2.96458	-3.74554	10.662	0.944139	2.84038
UCLP	Chin	Abs.mean	40	3.77895	1.89025	1.41724	8.81742	3.17441	4.38348
UCLP	Chin	Abs.std	40	1.07883	0.660902	0.311493	3.22443	0.867464	1.2902
UCLP	Chin	Max	40	5.28227	3.49338	-5.09593	16.1051	4.16503	6.39951
UCLP	Chin	Mean	40	0.670958	3.67208	-8.25633	8.81742	-0.503429	1.84534
UCLP	Chin	Median	40	0.524149	3.9697	-8.12137	8.16248	-0.745423	1.79372
UCLP	Chin	Min	40	-3.29274	3.16943	-12.4391	3.64279	-4.30637	-2.27911
UCLP	Chin	RMS	40	3.94884	1.96392	1.51102	9.3885	3.32075	4.57693
UCLP	Chin	Standard.Dev	40	2.20662	0.954074	0.643319	4.41612	1.9015	2.51175
UCLP	Chin	X10th.percentile	40	-1.82298	3.58885	-10.6525	5.23001	-2.97075	-0.675212
UCLP	Chin	X5th.percentile	40	-2.36928	3.43916	-11.1599	4.55265	-3.46917	-1.26938
UCLP	Chin	X90th.percentile	40	3.43254	4.17668	-6.01687	13.3389	2.09677	4.7683
UCLP	Chin	X95th.percentile	40	4.46419	3.68542	-5.62685	14.5346	3.28553	5.64284
UCLP	Eyes	Abs.mean	40	2.57775	1.07317	1.02329	5.3265	2.23453	2.92096
UCLP	Eyes	Abs.std	40	0.62368	0.177456	0.354564	1.16544	0.566927	0.680433
UCLP	Eyes	Max	40	3.83954	1.24697	1.98109	6.84885	3.44074	4.23834
UCLP	Eyes	Median	40	0.692619	2.312	-4.19073	4.24357	-0.0467946	1.43203
UCLP	Eyes	Min	40	-3.56349	1.66176	-7.69255	1.15492	-4.09495	-3.03204
UCLP	Eyes	RMS	40	2.66081	1.06577	1.08818	5.38673	2.31996	3.00166
UCLP	Eyes	Standard.Dev	40	2.31832	1.10123	0.648292	5.30916	1.96613	2.67051
UCLP	Eyes	X10th.percentile	40	-2.5986	1.77169	-6.45065	2.15767	-3.16521	-2.03198
UCLP	Eyes	X5th.percentile	40	-2.89022	1.78769	-6.9194	1.87053	-3.46195	-2.31849
UCLP	Eyes	X90th.percentile	40	3.01484	1.33885	-1.14045	5.94545	2.58666	3.44303
UCLP	Eyes	X95th.percentile	40	3.34456	1.19326	1.44183	6.28598	2.96294	3.72618
UCLP	Forehead	Abs.mean	40	3.19077	1.6127	1.18275	8.21338	2.67501	3.70654
UCLP	Forehead	Abs.std	40	0.862576	0.282476	0.414333	1.49682	0.772236	0.952916
UCLP	Forehead	Max	40	4.5651	2.13599	1.46439	9.9144	3.88198	5.24822
UCLP	Forehead	Mean	40	-0.127055	2.55143	-6.80824	5.38144	-0.94304	0.688931
UCLP	Forehead	Median	40	-0.262902	3.37682	-8.16374	5.5054	-1.34286	0.817056
UCLP	Forehead	Min	40	-4.69369	2.00204	-11.7217	-2.24698	-5.33397	-4.05341
UCLP	Forehead	RMS	40	3.31946	1.60761	1.27565	8.34029	2.80532	3.8336
UCLP	Forehead	Standard.Dev	40	2.41225	1.17953	0.777351	5.53739	2.03502	2.78948
UCLP	Forehead	X10th.percentile	40	-2.78252	3.04471	-10.0418	3.99938	-3.75627	-1.80878
UCLP	Forehead	X5th.percentile	40	-3.44435	2.69631	-10.4384	3.74031	-4.30667	-2.58202
UCLP	Forehead	X90th.percentile	40	3.16389	1.93381	-0.923417	7.36443	2.54543	3.78235
UCLP	Forehead	X95th.percentile	40	3.63829	1.88595	-0.566771	7.8076	3.03513	4.24144
UCLP	Lowerlip	Abs.mean	40	2.84072	1.09806	1.32517	6.10641	2.48954	3.1919
UCLP	Lowerlip	Abs.std	40	0.849594	0.26806	0.44266	1.55235	0.763864	0.935324
UCLP	Lowerlip	Max	40	4.18579	1.36295	1.26091	7.36805	3.7499	4.62168
UCLP	Lowerlip	Mean	40	0.311323	1.96578	-4.83138	3.62038	-0.317364	0.940011
UCLP	Lowerlip	Median	40	0.136585	2.73081	-5.48652	3.61445	-0.736771	1.00994
UCLP	Lowerlip	Min	40	-3.83129	2.23985	-8.16762	1.35129	-4.54763	-3.11495
UCLP	Lowerlip	RMS	40	2.9809	1.0867	1.44295	6.14088	2.63336	3.32844
UCLP	Lowerlip	Standard.Dev	40	2.20722	1.15502	0.762587	5.78132	1.83783	2.57661
UCLP	Lowerlip	X10th.percentile	40	-2.3182	2.52618	-7.09246	2.08914	-3.12612	-1.51029
UCLP	Lowerlip	X5th.percentile	40	-2.71942	2.46877	-7.31648	1.74313	-3.50897	-1.92987
UCLP	Lowerlip	X90th.percentile	40	3.122	1.91012	-3.61894	6.81874	2.51112	3.73289
UCLP	Lowerlip	X95th.percentile	40	3.45403	1.79628	-2.79789	7.04106	2.87956	4.02851
UCLP	Nose	Abs.mean	40	2.84718	1.02868	1.43673	7.07194	2.51819	3.17617
UCLP	Nose	Abs.std	40	0.979657	0.340585	0.475012	1.95317	0.870733	1.08858
UCLP	Nose	Max	40	4.62326	1.27744	2.39513	8.99205	4.21472	5.03181
UCLP	Nose	Mean	40	-0.113487	1.81915	-6.22303	2.45522	-0.695281	0.468307
UCLP	Nose	Median	40	0.103403	2.50688	-6.84741	3.28225	-0.698337	0.905143
UCLP	Nose	Min	40	-4.7194	1.64405	-10.4471	-1.85532	-5.24519	-4.1936
UCLP	Nose	RMS	40	3.02605	1.03973	1.53107	7.3367	2.69352	3.35857
UCLP	Nose	Standard.Dev	40	2.55176	0.686892	1.2652	3.886	2.33208	2.77144
UCLP	Nose	X10th.percentile	40	-3.3113	2.03553	-9.83095	1.85339	-3.96229	-2.6603
UCLP	Nose	X5th.percentile	40	-3.85757	1.75213	-10.1366	-1.27595	-4.41792	-3.29721
UCLP	Nose	X90th.percentile	40	3.0837	1.65752	-3.63121	5.278	2.5536	3.6138
UCLP	Nose	X95th.percentile	40	3.80333	0.935776	1.80462	5.9261	3.50405	4.1026
UCLP	Upperlip	Abs.mean	40	2.77371	1.16197	1.14773	5.90226	2.40209	3.14532
UCLP	Upperlip	Abs.std	40	0.72729	0.195509	0.361322	1.28885	0.664763	0.789817
UCLP	Upperlip	Max	40	1.83673	2.71049	-4.37546	5.55256	0.969878	2.70359
UCLP	Upperlip	Mean	40	-1.50223	2.13787	-5.90226	2.73137	-2.18596	-0.818505
UCLP	Upperlip	Median	40	-1.64073	2.37929	-5.93527	2.80333	-2.40167	-0.879797
UCLP	Upperlip	Min	40	-4.25136	1.99686	-7.77165	1.24493	-4.88999	-3.61273
UCLP	Upperlip	RMS	40	2.87917	1.14868	1.26096	5.97135	2.5118	3.24653
UCLP	Upperlip	Standard.Dev	40	1.50438	0.784451	0.361322	3.04949	1.2535	1.75526
UCLP	Upperlip	X10th.percentile	40	-3.13566	2.04091	-7.18312	2.04712	-3.78838	-2.48294
UCLP	Upperlip	X5th.percentile	40	-3.45186	2.05153	-7.37728	1.8068	-4.10797	-2.79574
UCLP	Upperlip	X90th.percentile	40	0.727085	2.62722	-4.74484	4.09641	-0.11314	1.56731
UCLP	Upperlip	X95th.percentile	40	1.20828	2.59991	-4.63082	4.54709	0.376789	2.03977
